# Supplementary material
Source: PubMed Central journal article supplement (PMC3232718)
Supplement: supp_10.12.1607_TableS1.pdf [file supp_10.12.1607_TableS1.pdf]

Table S1. Sequences of oligonucleotides used in this study

| Primer                    | Sequence <sup>a</sup>                                            |
|---------------------------|------------------------------------------------------------------|
| full-length 4HA-myb2      |                                                                  |
| bgl2-ha-myb2-5'           | <u>AGATCT</u> TACCCATACGATGTC                                    |
| N-terminal deletion       |                                                                  |
| bamh1-myb2(48)-5'         | TTTTTTGGATCCAAAAAGCAAAAATTCACACCAG                               |
| bamh1-myb2(55)-5'         | TTTTGGATCCGAAGAAGATGAAATGCTCAAGC                                 |
| not1-myb2(48)-5'          | <u>GCGGCCGC</u> ATGAAAAAGCAAAAATTCACACCAG                        |
| C-terminal deletion       |                                                                  |
| myb2(T133ochre)-5'        | CCTGGAAGA <u>TAA</u> GATATTCATATCAAGAATAGATGGGT                  |
| myb2(T133ochre)-3'        | TTGATATGAATATC <u>TTA</u> ICTTCCAGGGAAAACTTTGC                   |
| myb2(I144ochre)-5'        | GATGGGTTACA <u>TAA</u> TCAAATAAGCTTGAATACCTCA                    |
| myb2(I144ochre)-3'        | GCTTATTTGA <u>TTA</u> TGTAACCCATCTATTCTTGATATGAA                 |
| TetR fusion protein       |                                                                  |
| myb2(143)-tetR-5'         | TGGGTTACAATGTCTAGATTAGATAAAAAGTAAAGTGATT                         |
| myb2(143)-tetR-3'         | TCTAATCTAGACATTGTAACCCATCTATTCTTGATATGA                          |
| not1-SV40-tetR-5'         | <u>GCGGCCGC</u> ATGAAGAAGAAGCGCAAGGTGTCTAGATTAGATAAAA<br>AGTAAAG |
| neo-3'                    | GCCGAATAGCCTCTCCACCCAA                                           |
| Luciferase fusion protein |                                                                  |
| xho1-luc-5'               | TCT <u>CTCGAG</u> ATGGAAGACGCCAAAAACATAAAG                       |
| bamh1-SV40-tetR-5'        | AAAGAAGAAGCGTAAGGTCGGATCCATGTCTAGATTAGATAAAA<br>G                |
| bgl2-SV40-ha-3'           | TTCTTCTTTGGAGATCTAAGAGCGTAATCTGGAACATCGTATGGG                    |
| site-directed mutagenesis |                                                                  |
| myb2(K51A)-5'             | AAAAAAGCAA <u>GCA</u> ATTCACACCAGAAGAAGATGAAA                    |
| myb2(K51A)-3'             | TGGTGTGAAT <u>TGC</u> TTGCTTTTTTGCAGCTTTTAA                      |
| myb2(I74A)-5'             | GGAAAATG <u>GCT</u> GCTGCTACTTTTCCAAATAGAAA                      |
| myb2(I74A)-3'             | GTAGCAGC <u>AGC</u> CATTTTCCAATCGCTTCCAT                         |
| myb2(I74P)-5'             | GGAAAATG <u>CCT</u> GCTGCTACTTTTCCAAATAGAAA                      |
| myb2(I74P)-3'             | GTAGCAGC <u>AGG</u> CATTTTCCAATCGCTTCCAT                         |
| myb2(KK48~49AA)-5'        | AAAGCTGCA <u>GCAGCG</u> CAAAAATTCACACCAGAAGAA                    |
| myb2(KK48~49AA)-3'        | GAATTTTTG <u>CGCTGC</u> TGCAGCTTTTAAATCACTTGTAC                  |
| myb2(KR61~62AA)-5'        | GAAATGCTC <u>GCGGCT</u> GCTGTGCTCAACATGG                         |
| myb2(KR61~62AA)-3'        | AGCGACAGC <u>AGCCGC</u> GAGCATTTCATCTTCTTCTGGT                   |
| myb2(K138A)-5'            | ATTCATATC <u>GCG</u> AATAGATGGGTTACAATTTCAAATA                   |
| myb2(K138A)-3'            | CCCATCTATT <u>CGC</u> GATATGAATATCTGTTCTTCCAGGG                  |
| myb2(N139A)-5'            | TCATATCAAG <u>GCT</u> AGATGGGTTACAATTTCAAATAAG                   |
| myb2(N139A)-3'            | AACCCATCT <u>AGC</u> CTTGATATGAATATCTGTTCTTCCAG                  |
| recombinant protein       |                                                                  |
| sac1-myb2(48)-5'          | TTTTGAGCTCAAAAAGCAAAAATTCACACCAG                                 |
| myb2(148)-bamh1-3'        | TTTTGGATCCAAGCTTATTTGAAATTGTAACCCA                               |

<sup>a</sup> The restriction site as designed into the name of the primer is underlined, where as the site to be mutated is boxed.
